# Supplementary material for: Construction of self-signal DNA electrochemical biosensor employing WS2 nanosheets combined with PIn6COOH
Source: Royal Society of Chemistry journal article supplement (doi:10.1039/c8ra10266j), 2019-01-01
Supplement: c8ra10266j1.pdf [file c8ra10266j1.pdf]

## Supplementary Information

### Construction of self-signal DNA electrochemical biosensor employing WS<sub>2</sub> nanosheets combined with PIn6COOH

Jimin Yang<sup>1</sup>, Lei Gao<sup>1</sup>, Cheng Peng, Wei Zhang\*

*School of Chemistry and Chemical Engineering, Linyi University, Linyi 276005, China*

*\*E-mail: zhangweiqust@126.com(W. Zhang)*

*<sup>1</sup>These two authors contributed equally to this work.*

### 3. Results and discussion

#### 3.1. Structural characterizations

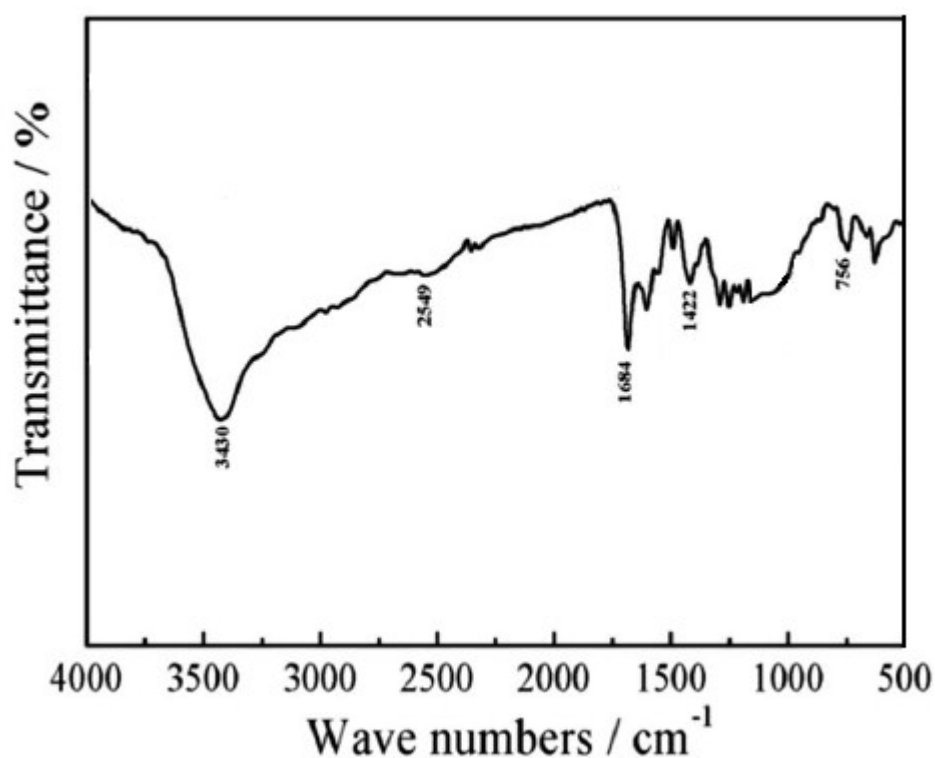

Fig. S1 The FT-IR spectrum of the PIn6COOH/WS<sub>2</sub> composite.

3.8. Detection of target DNA in serum samples by the biosensor

**Table S1. Detection of target DNA in serum samples by the biosensor.**

| Serum samples | target DNA added (fM) | target DNA detected (fM) | Recovery (%) | RSD (%) |
|---------------|-----------------------|--------------------------|--------------|---------|
| 1             | 2                     | 1.95                     | 97.5         | 3.86    |
| 2             | 10                    | 9.96                     | 99.6         | 4.37    |
| 3             | 20                    | 20.2                     | 101          | 5.19    |
